# Supplementary material for: Endogenous Murine BST-2/Tetherin Is Not a Major Restriction Factor of Influenza A Virus Infection
Source: PubMed Central journal article supplement (PMC4643895; doi:10.1371/journal.pone.0142925), 2015-11-13
Supplement: pone.0142925.s003.pdf [file pone.0142925.s003.pdf]

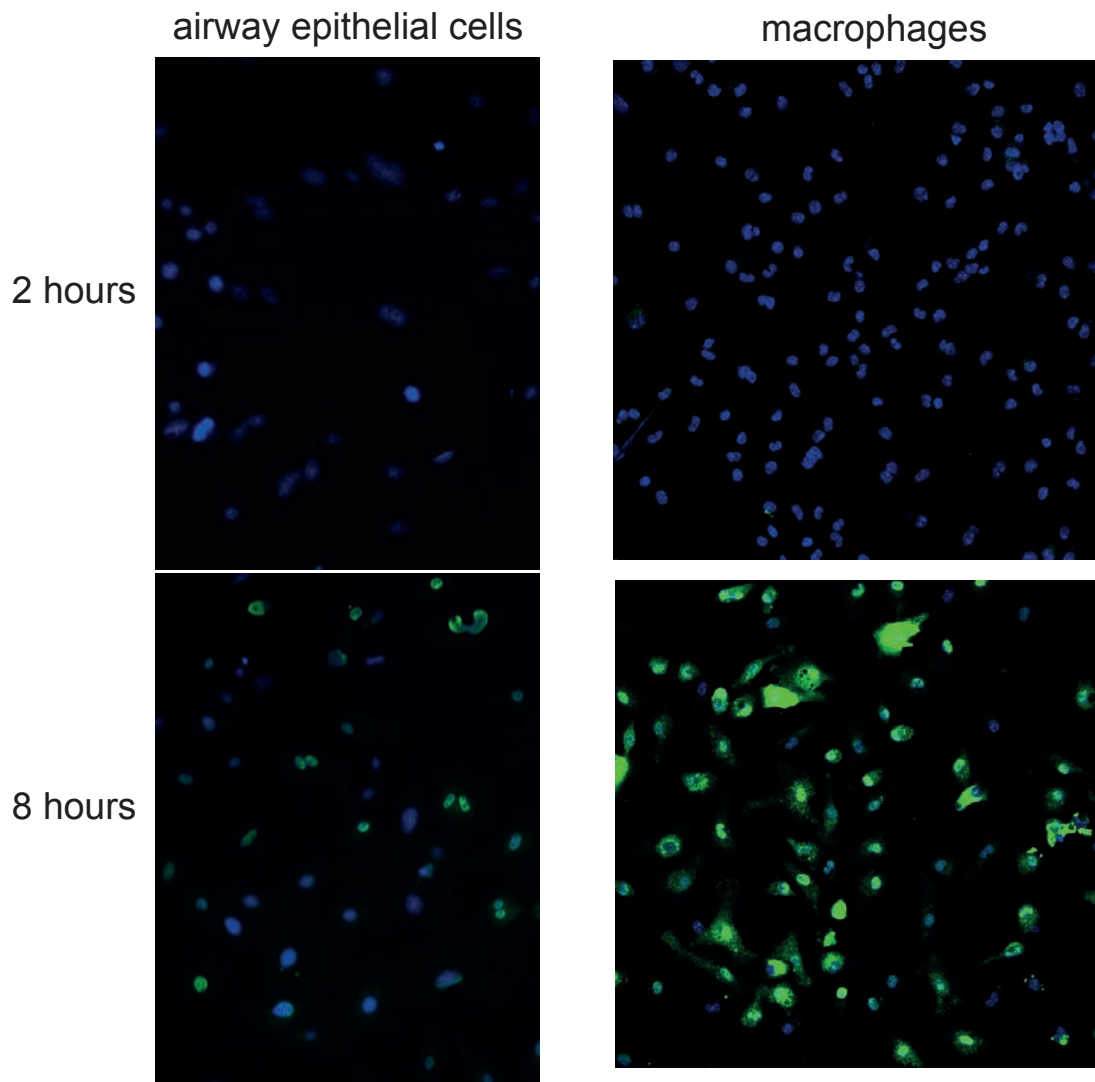

**S2 Fig.** Assessment of viral nucleoprotein expression in primary murine epithelial cells and macrophages following IAV infection.
